# Supplementary material
Source: PubMed Central journal article supplement (PMC1871831)

A

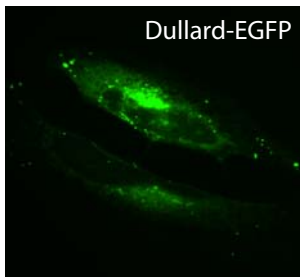

B

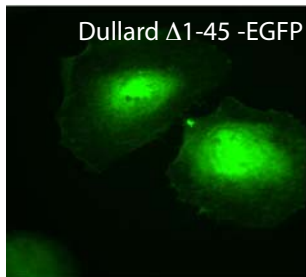

C

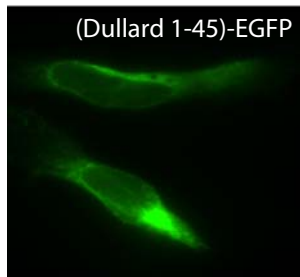

Supplement: pnas_0702099104_1.pdf [file pnas_0702099104_1.pdf]
